# Supplementary material
Source: PubMed Central journal article supplement (PMC7228718)
Supplement: mmc1.pdf [file mmc1.pdf]

# THE LANCET

## Infectious Diseases

### Supplementary appendix

This appendix formed part of the original submission. We post it as supplied by the authors.

Supplement to: Buonsenso D, Parri N, De Rose C, et al. Toward a clinically based classification of disease severity for paediatric COVID-19. *Lancet Infect Dis* 2020; published online May 15. [http://dx.doi.org/10.1016/S1473-3099\(20\)30396-0](http://dx.doi.org/10.1016/S1473-3099(20)30396-0).

## **Appendix**

On behalf of the pediatric COVID-19 team of our Institution: Giuseppe Zampino, Antonio Chiaretti, Antonio Gatto, Roberta Onesimo, Chiara Leoni, Giorgio Attinà, Valeria Pansini, Ilaria Lazzareschi, Carmen Cocca, Eugenio Mercuri.
